# Supplementary material for: Huaier attenuates the adverse effects of pyroptosis by regulating the methylation of rat mesangial cells: an in vitro study
Source: Springer Nature journal article supplement (doi:10.1186/s12906-022-03559-4), 2022-03-29

# Supplementary Information file 1

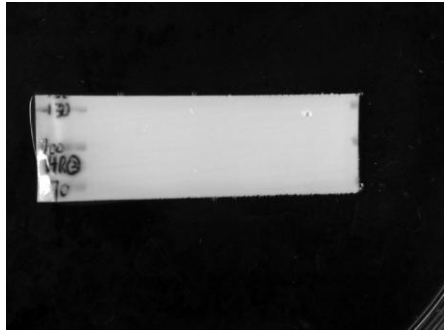

PARP

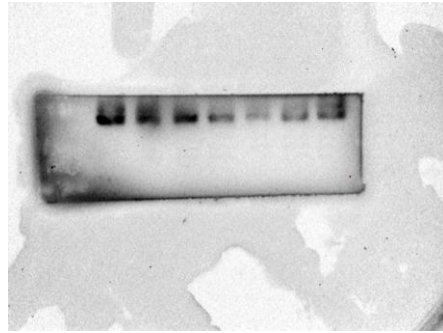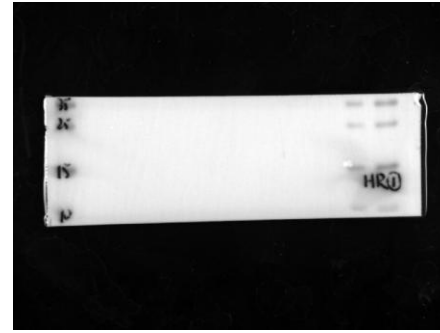

Pro caspase-3

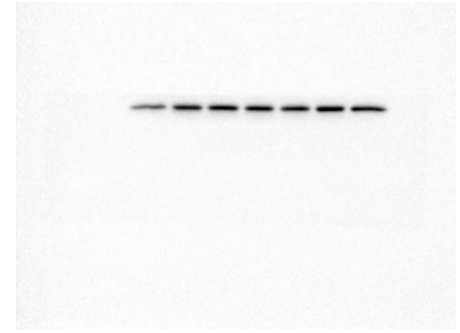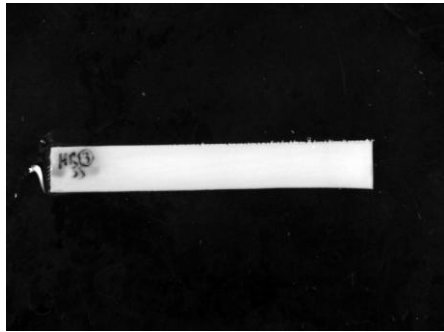

$\alpha/\beta$ -tubulin

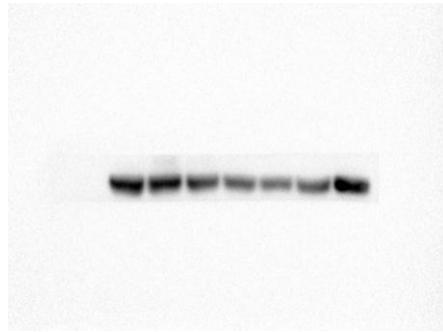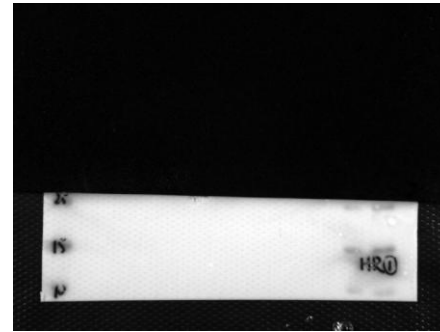

Cleaved caspase-3

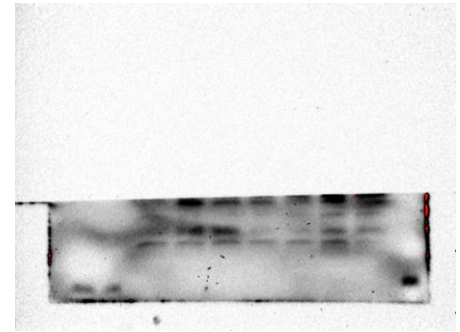

Supplement: MOESM1 [file 20268662]
