# Supplementary material for: Huaier attenuates the adverse effects of pyroptosis by regulating the methylation of rat mesangial cells: an in vitro study
Source: Springer Nature journal article supplement (doi:10.1186/s12906-022-03559-4), 2022-03-29
Supplement: MOESM5 [file 20268662]

# Supplementary Information file 5

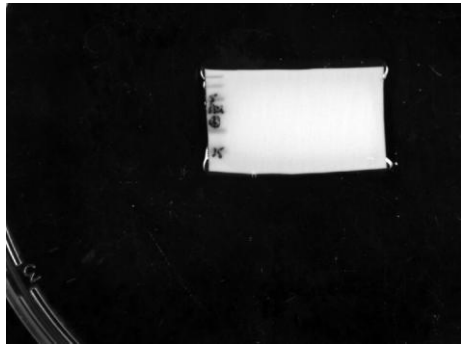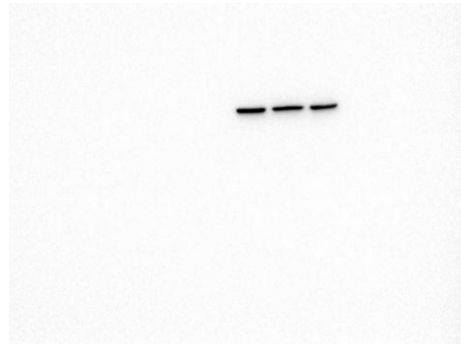

**GSDME-FL**

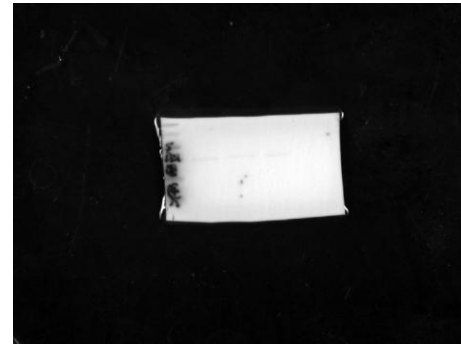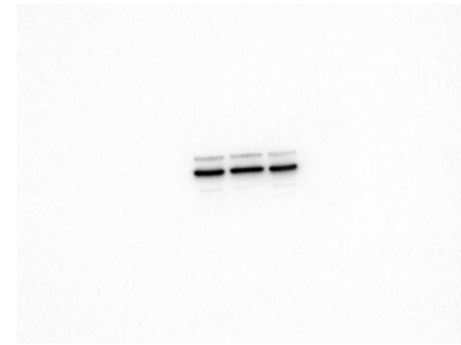

**GAPDH**

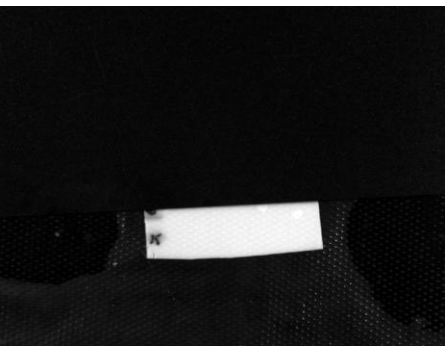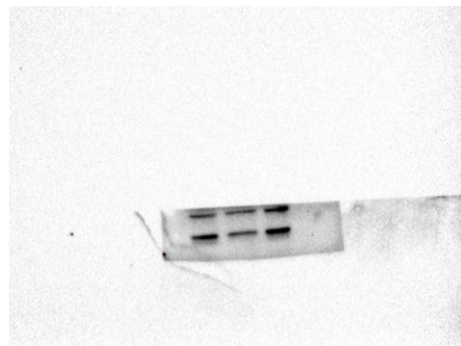

**GSDME-NT**
